# Supplementary material
Source: Springer Nature journal article supplement (https://www.springermedizin.de/resource/supplementary/13054_2010_9529_MOESM3_ESM.pdf/9706352)

# Survival (%)

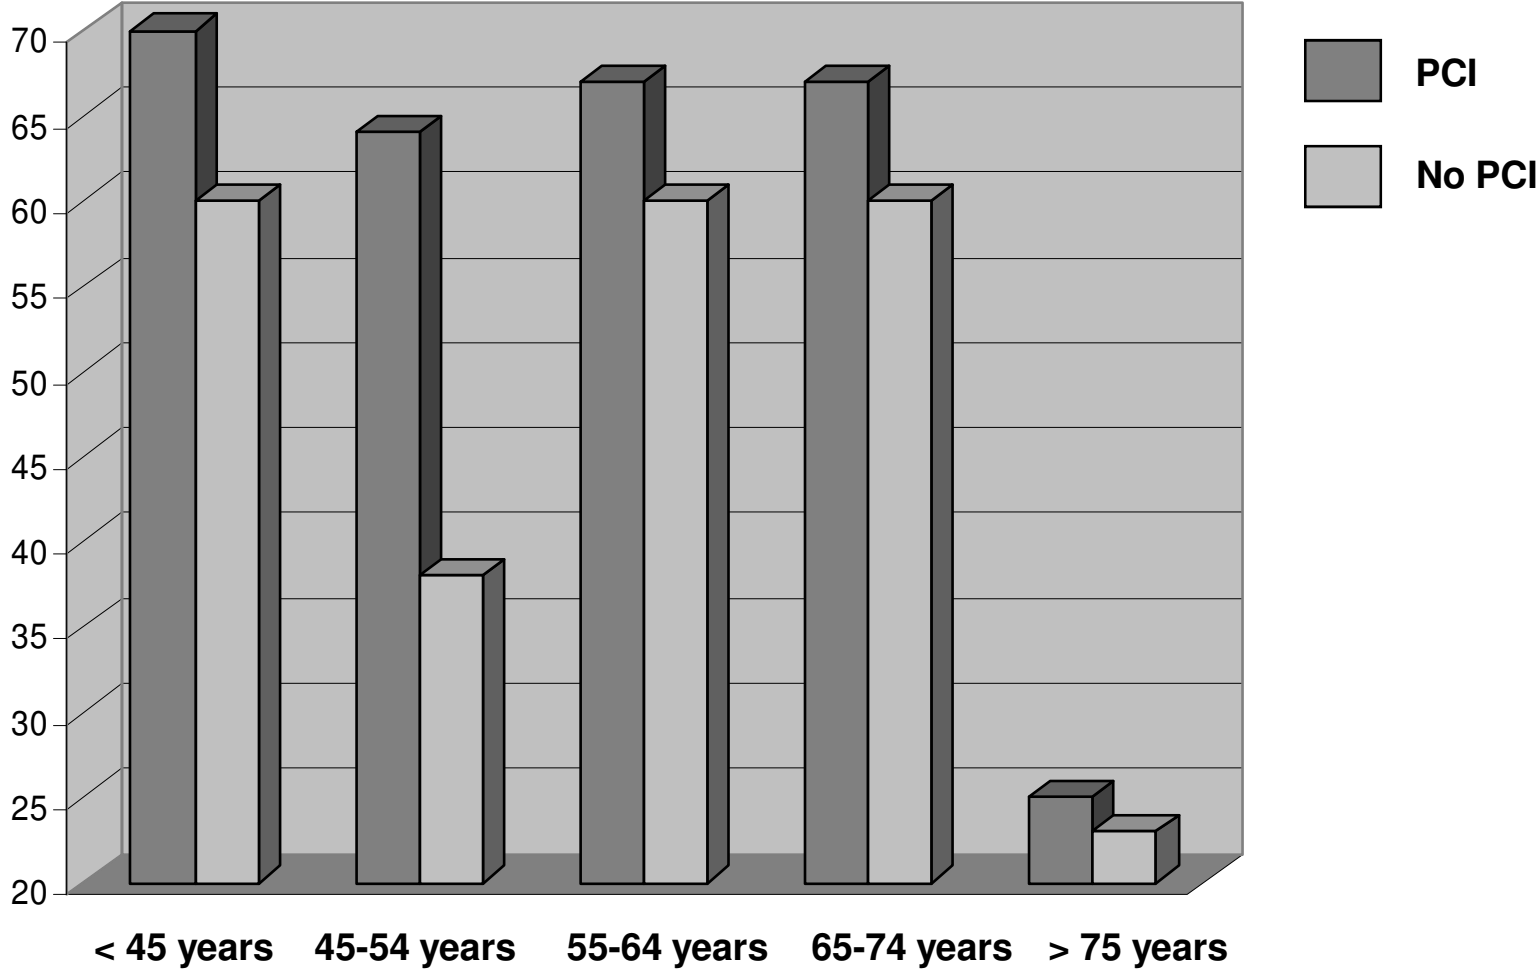

Supplement: MOESM3 [file 9706352]
